# Supplementary material
Source: PubMed Central journal article supplement (PMC1413626)
Supplement: pnas_0507179103_3.pdf [file pnas_0507179103_3.pdf]

**Table 2. Orbitals used in the parameterization of the unpaired electron spin density**

| Center                | Type           | $Z_{\text{eff}}$ | $\rho^*$ , % |
|-----------------------|----------------|------------------|--------------|
| Cu                    | $3d_{x^2-y^2}$ | 6.0              | 46           |
| Cys-89 S $^\gamma$    | $3p_{xy}$      | 4.3              | 42           |
| His-39 N $^\delta$    | $2p^\dagger$   | 3.2              | 5            |
| His-92 N $^\delta$    | $2p^\dagger$   | 3.2              | 5            |
| Met-97 S $^\delta$    | $3p_z$         | 4.3              | 1.4          |
| Cys-89 H $^{\beta_1}$ | 1s             | 1.0              | 0.5          |
| Cys-89 H $^{\beta_2}$ | 1s             | 1.0              | 0.4          |

The hydrogen-like Slater-type orbitals used in the structure calculation of the metal site of *A.v.* plastocyanin. The molecular coordinate system is defined by the copper ion at the origin, the Met-97 S $^\delta$  along the  $z$ -axis, and Cys-89 S $^\gamma$  with an azimuth angle of  $\pi/4$ .

\* Average values of atomic spin densities obtained from XAS, ENDOR, and NMR (see text).

† The orientation of the 2p orbitals at the His-39 N $^\delta$  and His-92 N $^\delta$  ligands were defined so that the symmetry axis of the 2p orbital points toward the copper ion.
