# Supplementary material
Source: PubMed Central journal article supplement (PMC1413626)
Supplement: pnas_0507179103_5.pdf [file pnas_0507179103_5.pdf]

**Table 3. Distances and NOEs from the Cys-89  $\beta$ -protons to other protons in the vicinity**

| Nucleus                                              | Cys-89 H <sup><math>\beta</math></sup> <sub>1</sub> , Å* | Cys-89 H <sup><math>\beta</math></sup> <sub>2</sub> , Å† |
|------------------------------------------------------|----------------------------------------------------------|----------------------------------------------------------|
| His-39 H <sup><math>\alpha</math></sup>              | 4.5 (Medium)                                             | 5.4 (None)                                               |
| Asn-40 H <sup>N</sup>                                | 3.8 (Medium)                                             | 4.6 (None)                                               |
| Cys-89 H <sup>N</sup>                                | 3.4 (Medium)                                             | 2.4 (Very strong)                                        |
| Cys-89 H <sup><math>\alpha</math></sup>              | 2.8 (Strong)                                             | 2.9 (Medium)                                             |
| Glu-90 H <sup>N</sup>                                | 3.3 (Medium)                                             | 4.3 (None)                                               |
| Met-97 H <sup><math>\gamma</math></sup> <sub>1</sub> | 4.8 (Weak)                                               | 4.1 (Medium)                                             |

The distances are obtained from the NMR solution structure of reduced *A.v.* plastocyanin [PDB ID 1FA4 (1)]. The relative strength of the observed NOEs are given in brackets.

\* The chemical shift of Cys-89 H <sup>$\beta$</sup> <sub>1</sub> is 3.33 ppm in the reduced form and  $\approx$ 700 ppm in the oxidized form.

† The chemical shift of Cys-89 H <sup>$\beta$</sup> <sub>2</sub> is 2.89 ppm in the reduced form and  $\approx$ 440 ppm in the oxidized form.

1. Ma, L., Jørgensen, A.-M. M., Sørensen, G. O., Ulstrup, J. & Led, J. J. (2000) *J. Am. Chem. Soc.* **122**, 9473–9485.
