# Supplementary material
Source: PubMed Central journal article supplement (PMC1413626)
Supplement: pnas_0507179103_6.pdf [file pnas_0507179103_6.pdf]

**Table 4. Paramagnetic relaxation enhancements used in the structure calculation of the metal site of A.v. plastocyanin**

| Nucleus                  | $R_{1p}$ , $\text{ms}^{-1}$ * | $\nu$ , MHz | $k_{\text{prlx}}^{\pm}$ † |
|--------------------------|-------------------------------|-------------|---------------------------|
| His-39 H $^{\beta_1}$    | $0.62 \pm 0.09$               | 800         | 500                       |
| His-39 H $^{\epsilon_1}$ | $3.30 \pm 0.20$               | 800         | 50                        |
| His-39 H $^{\delta_2}$   | $0.31 \pm 0.02$               | 800         | 500                       |
| Asn-40 H $^{\alpha}$     | $0.12 \pm 0.02$               | 800         | 500                       |
| Cys-89 H $^{\alpha}$     | $1.53 \pm 0.23$               | 800         | 500                       |
| Cys-89 H $^{\text{N}}$   | $0.36 \pm 0.12^{\ddagger}$    | 500         | 500                       |
| His-92 H $^{\epsilon_1}$ | $3.30 \pm 0.20$               | 800         | 50                        |
| His-92 H $^{\delta_2}$   | $0.31 \pm 0.02$               | 800         | 500                       |
| Met-97 H $^{\gamma_1}$   | $0.70 \pm 0.04$               | 800         | 500                       |
| Met-97 H $^{\gamma_2}$   | $0.30 \pm 0.02$               | 800         | 500                       |
| Cys-89 H $^{\beta_2}$    | $64 \pm 10^{\S}$              | 800         | 50                        |

\* Obtained from the relaxation recoveries (e.g. Fig. 6) in signal eliminating relaxation filter (SERF) experiments (1), as described previously (2), except for Cys-89 H $^{\text{N}}$  and Cys-89 H $^{\beta_2}$ , see text and below. The uncertainties used in the structure calculation correspond to approximately three times the uncertainty obtained from the experimental data, however larger than  $0.020 \text{ ms}^{-1}$ . This lower limit prevents overflow in the structure calculation during the high temperature dynamics.

† The force constant used for the different restraints. The unit is  $\text{kcal}\cdot\text{mol}^{-1}$  for  $k_{\text{prlx}}^{-}$  while  $\text{kcal}\cdot\text{mol}^{-1}\cdot\text{\AA}^{-2}$  for  $k_{\text{prlx}}^{+}$ .

‡ This restraint was obtained previously from one-dimensional NMR experiments on a partly oxidized sample (3).

§ This value corresponds to the dipolar transverse paramagnetic relaxation enhancement  $R_{2p}$ , which is obtained from Fig. 4.

1. Hansen, D. F. & Led, J. J. (2001) *J. Magn. Reson.* **151**, 339–346.
2. Hansen, D. F. & Led, J. J. (2004) *J. Am. Chem. Soc.* **126**, 1247–1253.
3. Jensen, M. R., Hansen, D. F. & Led, J. J. (2002) *J. Am. Chem. Soc.* **124**, 4093–4096.
