# Supplementary material
Source: PubMed Central journal article supplement (PMC1413626)

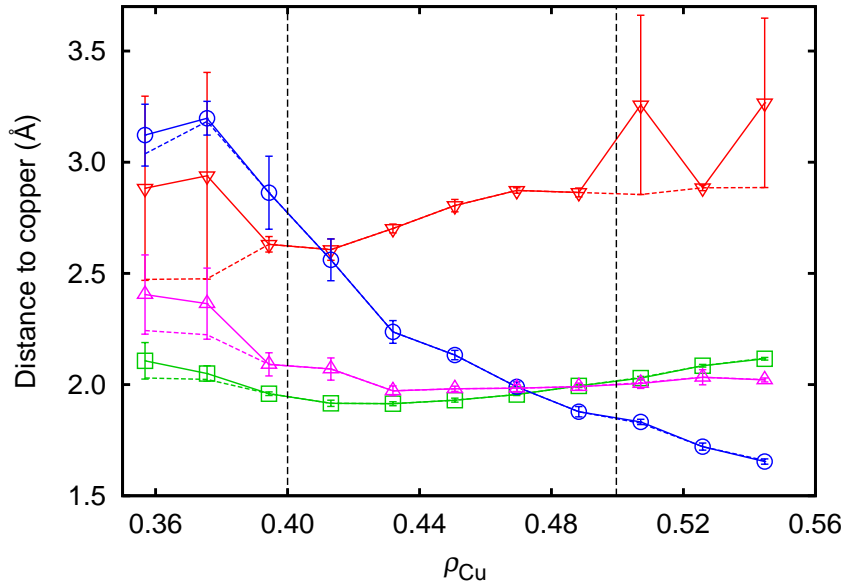

Supplement: pnas_0507179103_1.pdf [file pnas_0507179103_1.pdf]

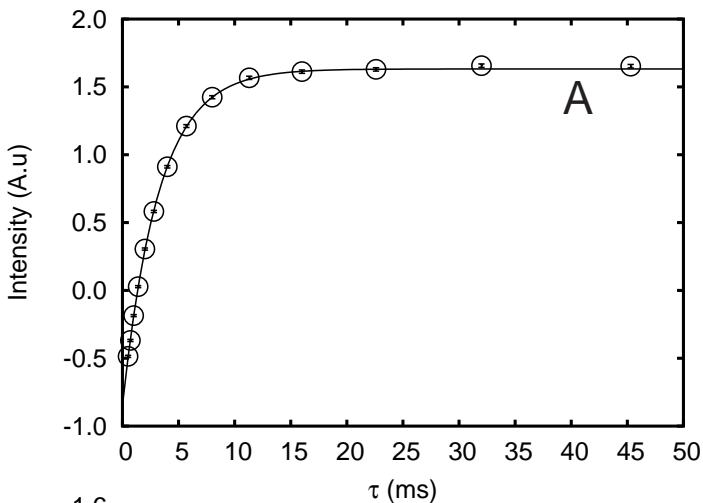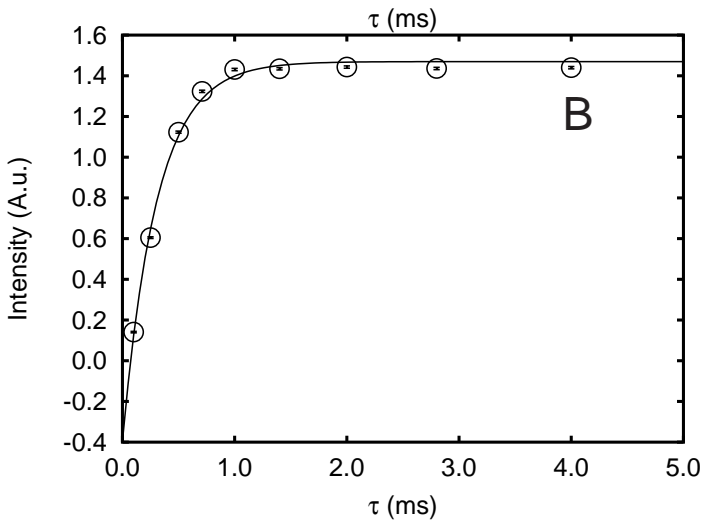

Supplement: pnas_0507179103_2.pdf [file pnas_0507179103_2.pdf]
